# Supplementary material
Source: PubMed Central journal article supplement (PMC6638992)
Supplement: ja7b01158_si_001.pdf [file ja7b01158_si_001.pdf]

# Identification of intra-helical bifurcated H-bonds as a new type of gate in $K^+$ channel

Oliver Rauh<sup>1</sup>, Martin Urban<sup>2</sup>, Leonhard M. Henkes<sup>2</sup>, Tobias Winterstein<sup>1</sup>, Timo Greiner<sup>1</sup>, James L. Van Etten<sup>3</sup>, Anna Moroni<sup>4</sup>, Stefan M. Kast<sup>2</sup>, Gerhard Thiel<sup>1\*</sup>, Indra Schroeder<sup>1</sup>

<sup>1</sup>Plant Membrane Biophysics, Technical University Darmstadt, Darmstadt, Germany, <sup>2</sup>Physikalische Chemie III, Technische Universität Dortmund, Dortmund, Germany, <sup>3</sup>Department of Plant Pathology and Nebraska Center for Virology, University of Nebraska Lincoln, Lincoln, Nebraska, United States 68583-0900, <sup>4</sup>Department of Biosciences and CNR IBF-Mi, Università degli Studi di Milano, Milano, Italy

\* Corresponding author E-mail: thiel@bio.tu-darmstadt.de

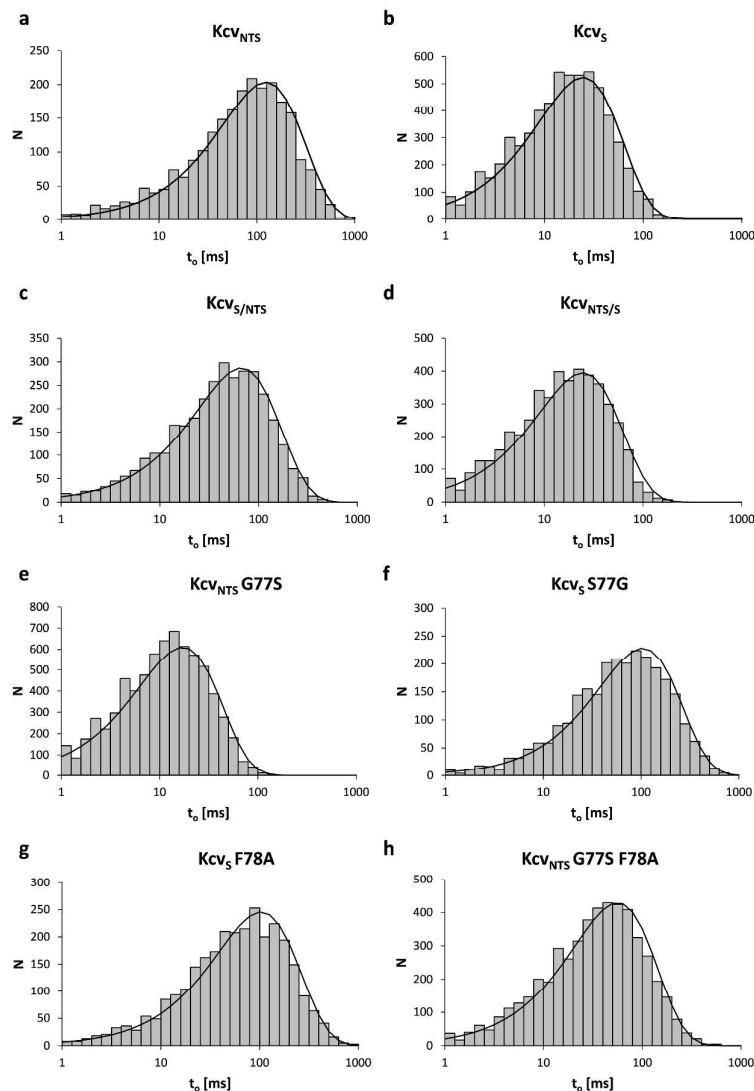

**Supplementary Figure 1.**

## Open dwell times of Kcv channels

Dwell time histograms from recordings at +120 mV for Kcv<sub>NTS</sub>, Kcv<sub>S</sub> and chimeras/ mutants. All open dwell time histograms can be fitted with a single exponential.

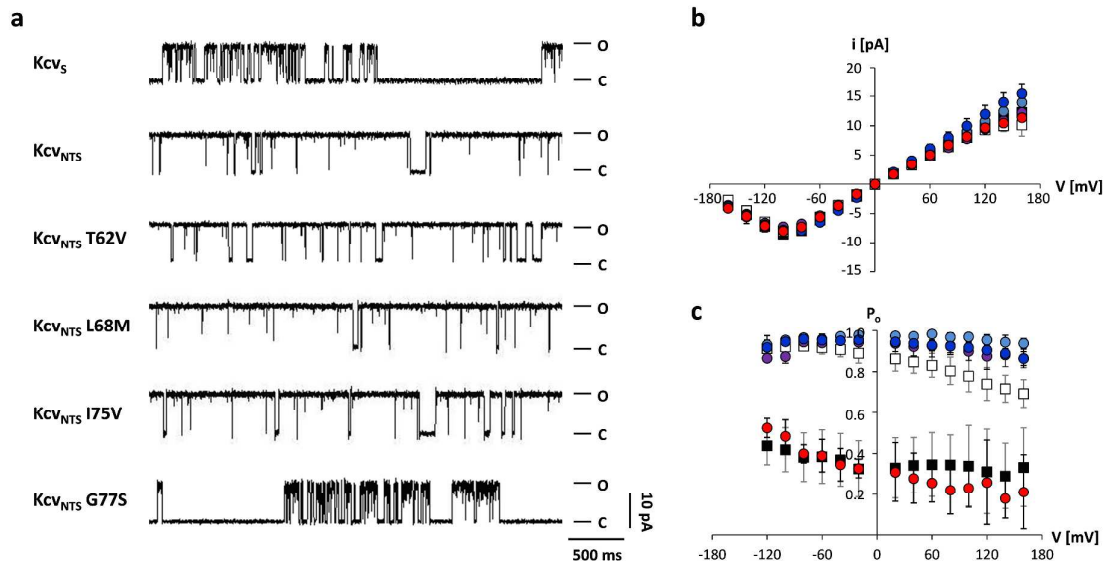

### Supplementary Figure 2.

**Only the exchange G77S in Kcv<sub>NTS</sub> results in the electrophysiological phenotype of Kcv<sub>S</sub>.**

To identify the relevant AA in TMD2 for gating we mutated all 4 candidates in Kcv<sub>NTS</sub> into the respective residue of Kcv<sub>S</sub>. **(a)** Characteristic single channel fluctuations of the wt channels Kcv<sub>S</sub> and Kcv<sub>NTS</sub> as well as the Kcv<sub>NTS</sub> mutants T62V, L68M, I75V and G77S at +120 mV in planar DPhPC bilayers. **(b)** Mean single channel *i/V* relations ( $\pm$  sd) and **(c)** mean open probabilities ( $\pm$  sd) of Kcv<sub>NTS</sub> (open squares, *n* = 6), Kcv<sub>S</sub> (filled squares, *n* = 9), Kcv<sub>NTS</sub> T62V (purple circles, *n* = 4), Kcv<sub>NTS</sub> L68M (light blue circles, *n* = 3), Kcv<sub>NTS</sub> I75V (blue circles, *n* = 4) and Kcv<sub>NTS</sub> G77S (red circles, *n* = 5).

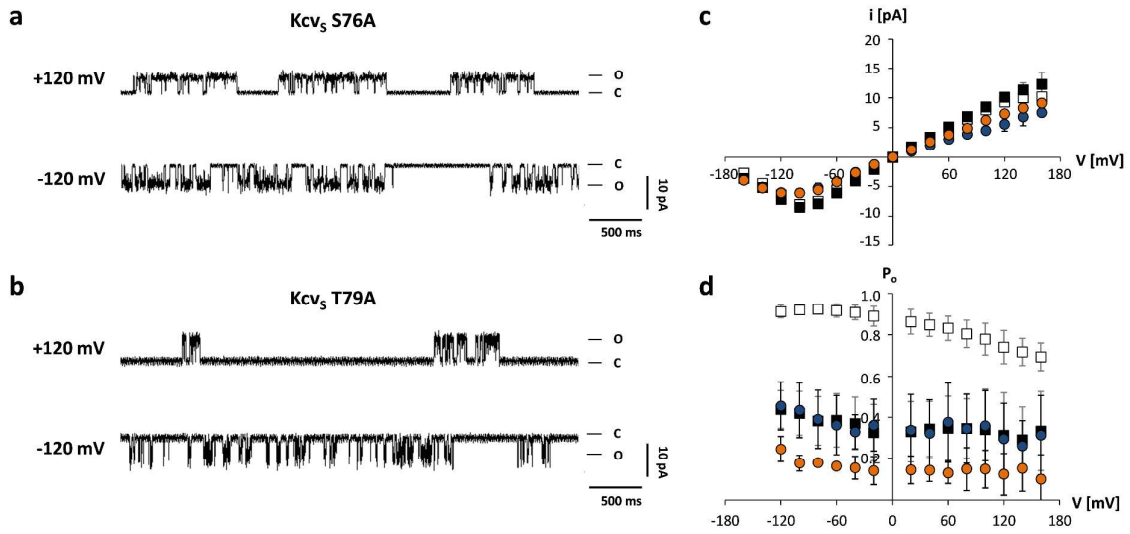

### Supplementary Figure 3.

#### **AAs S76 and T79 in Kcv<sub>S</sub> do not contribute to the long lived closed time.**

Characteristic single channel fluctuations of mutant Kcv<sub>S</sub> S76A (**a**) and Kcv<sub>S</sub> T79A (**b**) at +/- 120 mV in planar lipid bilayers. (**c**) Mean single channel *i/V* relations ( $\pm$  sd) and (**d**) mean open probabilities ( $\pm$  sd) of Kcv<sub>NTS</sub> (open squares), Kcv<sub>S</sub> (filled squares), Kcv<sub>S</sub> T79A (orange circles, *n* = 4) and Kcv<sub>S</sub> S76A F78A (blue circles, *n* = 3).

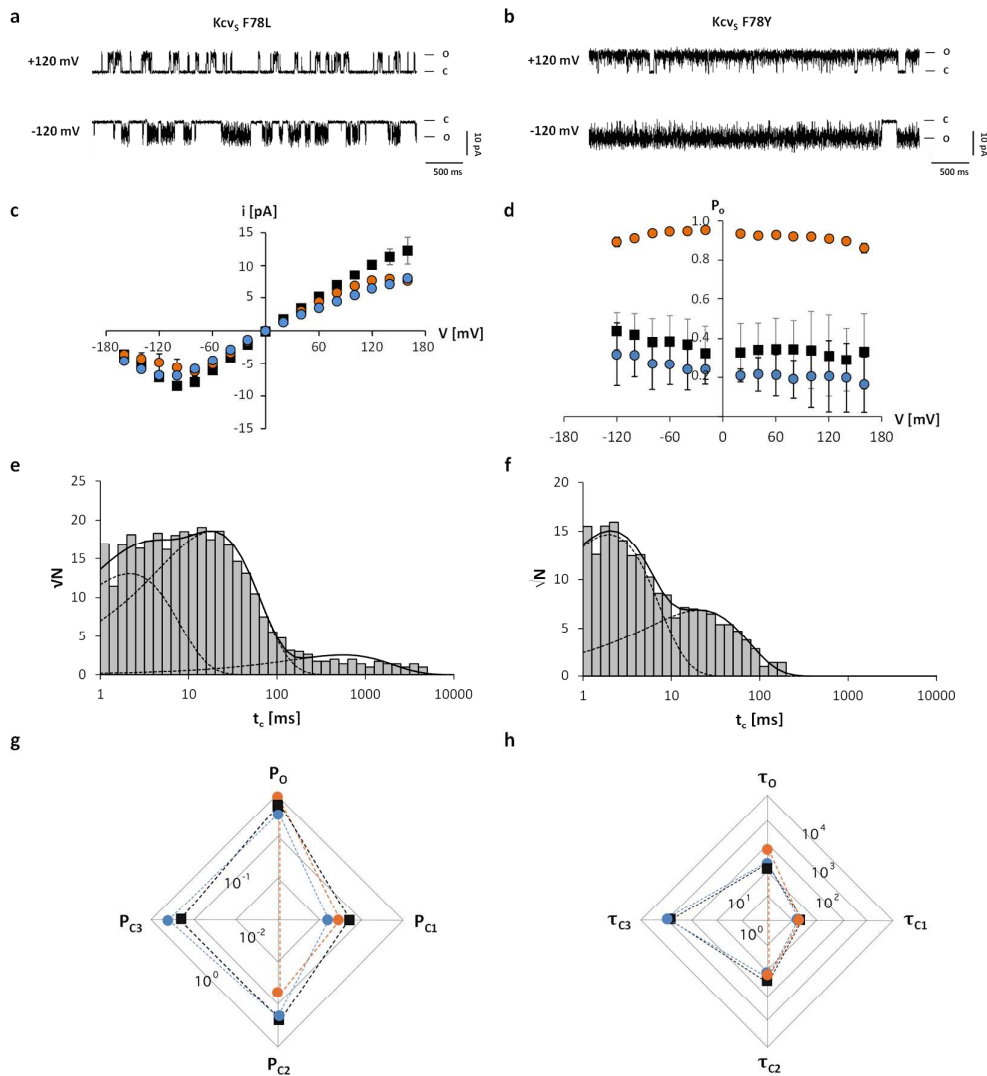

### Supplementary Figure 4.

**The gating function of the aromatic side chain of F78 can be substituted by the hydrophobic AA Leu but not by the aromatic side chain of Tyr.**

Characteristic single channel fluctuations of mutant Kcv<sub>S</sub> F78L (**a**) and Kcv<sub>S</sub> F78Y (**b**) at +/- 120 mV in planar lipid bilayers. (**c**) Mean single channel *i*/*V* relations ( $\pm$  sd) and (**d**) mean open probabilities ( $\pm$  sd) of Kcv<sub>S</sub> (filled squares), Kcv<sub>S</sub> F78Y (orange circles, *n* = 3) and Kcv<sub>S</sub> F78L (blue circles, *n* = 3). Exemplary closed dwell times at +120 mV for Kcv<sub>S</sub> F78L (**e**) and Kcv<sub>S</sub> F78Y (**f**). The data in **F** can be fitted with two exponentials while the data in **E** require a third exponential. (**g**) Probabilities (*P*) of the wt channel and mutants for occupying the open state (O) and the closed states (C1-C3) and mean lifetimes (in ms) of the open state ( $\tau_o$ ) and of the three closed states ( $\tau_{c1}$ - $\tau_{c3}$ ) (**h**). The probabilities of occupancy and mean lifetimes were calculated from three independent 5 min recordings. The symbols in d, g and h correspond to those in c.

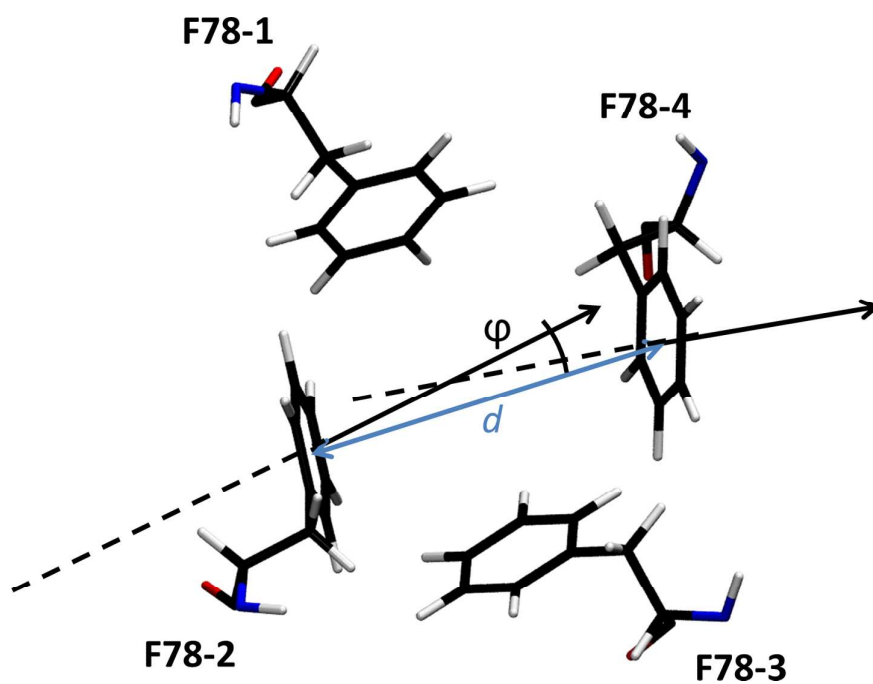

**Supplementary Figure 5.**

Definition of distance-angle pairs of F77 in KcV<sub>N</sub>T<sub>S</sub> and KcV<sub>S</sub> tetramers. The image illustrates the geometric criteria with distance  $d$  and angle  $\varphi$  for characterizing  $\pi$ -stack geometries in Fig. 7.

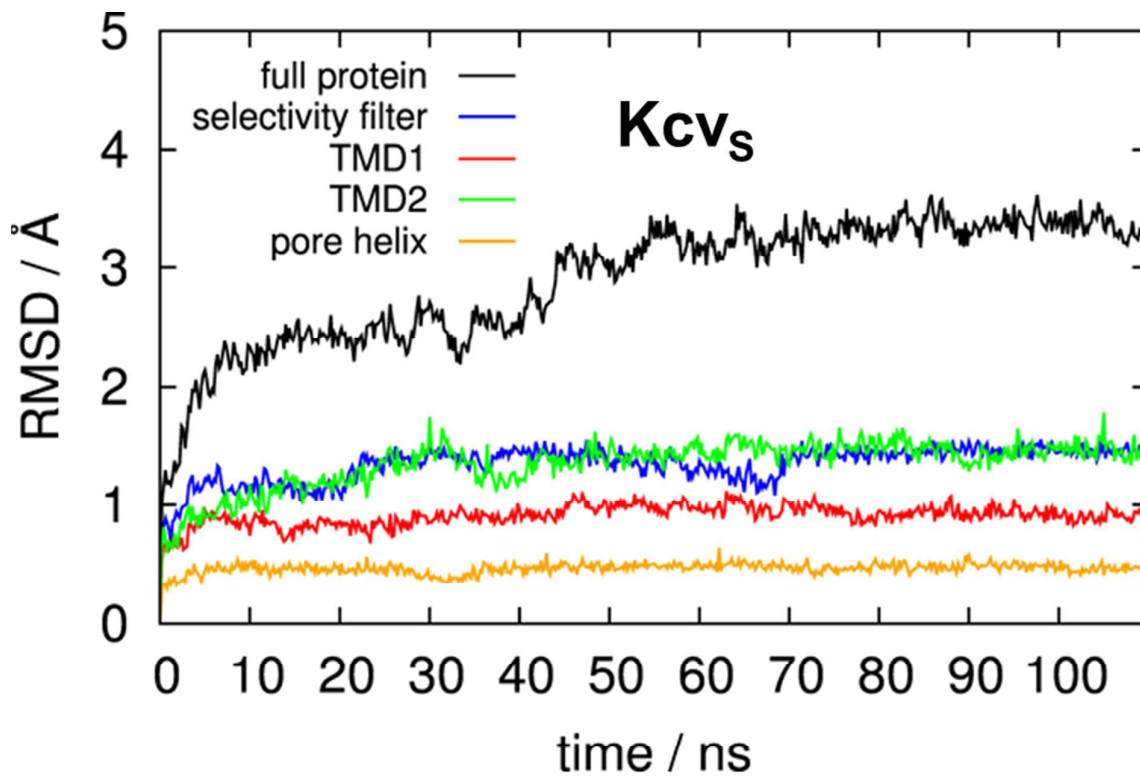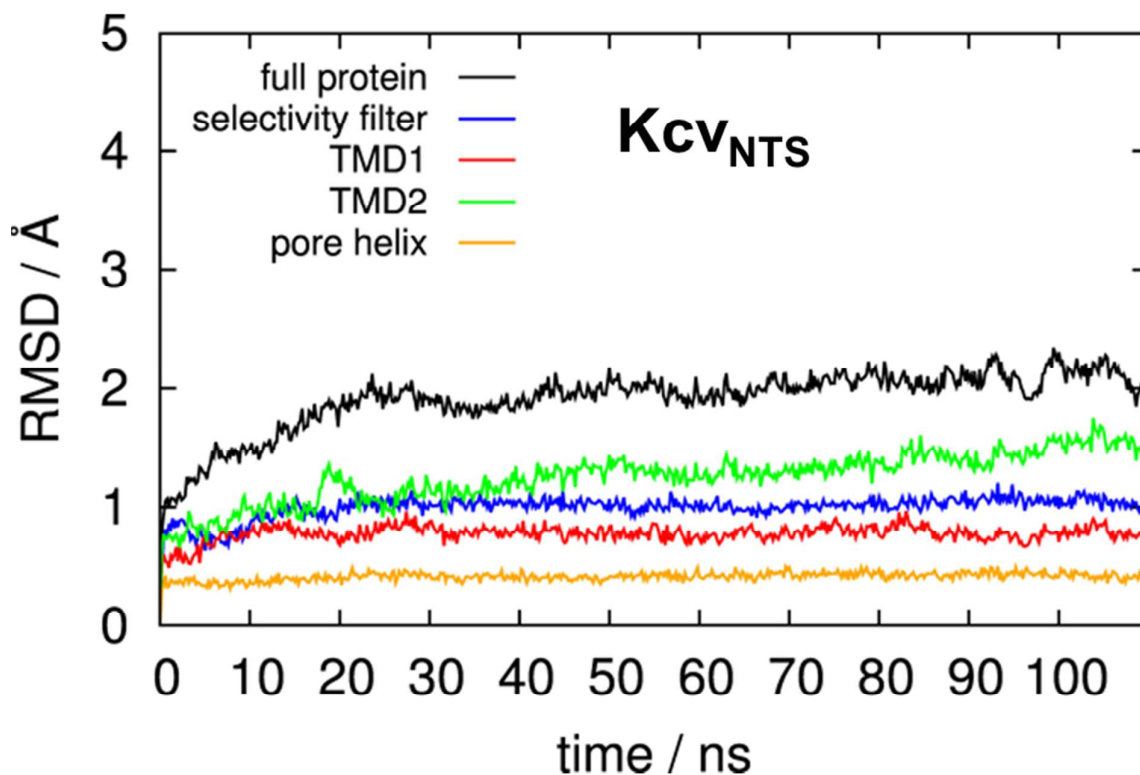

**Supplementary Figure 6.**

Demonstration of MD simulation stability for Kcv<sub>S</sub> (top) and Kcv<sub>NTS</sub> (bottom) models as measured by the root mean square deviations (RMSD) for various protein structure components with respect to the start of production runs.

|                                        | $\tau_o$ / ms   | $\tau_{C1}$ / ms | $\tau_{C2}$ / ms | $\tau_{C3}$ / ms | $P_o$         | $P_{C1}$      | $P_{C2}$      | $P_{C3}$      |
|----------------------------------------|-----------------|------------------|------------------|------------------|---------------|---------------|---------------|---------------|
| <b>Kcv<sub>NTS</sub></b>               | 79.1 ± 18.6     | 1.3 ± 0.2        | 24.0 ± 3.9       | -                | 0.874 ± 0.073 | 0.008 ± 0.002 | 0.117 ± 0.075 | 0             |
| <b>Kcv<sub>S</sub></b>                 | 15.1 ± 2.5      | 1.8 ± 0.8        | 23.8 ± 9.4       | 480 ± 145        | 0.525 ± 0.101 | 0.047 ± 0.029 | 0.208 ± 0.095 | 0.220 ± 0.152 |
| <b>Kcv<sub>S/NTS</sub></b>             | 63.5 ± 28.4     | 1.1 ± 0.5        | 47.6 ± 12.2      | -                | 0.704 ± 0.171 | 0.008 ± 0.003 | 0.252 ± 0.171 | 0             |
| <b>Kcv<sub>NTS/S</sub></b>             | 15.4 ± 6.4      | 2.1 ± 1.1        | 17.0 ± 3.4       | 1070 ± 118       | 0.227 ± 0.053 | 0.018 ± 0.011 | 0.109 ± 0.028 | 0.647 ± 0.028 |
| <b>Kcv<sub>S</sub> S77G</b>            | 79.7 ± 15.7     | 1.3 ± 0.1        | 28.4 ± 3.6       | -                | 0.904 ± 0.029 | 0.012 ± 0.004 | 0.084 ± 0.031 | 0             |
| <b>Kcv<sub>NTS</sub> G77S</b>          | 11.2 ± 0.4      | 1.2 ± 0.2        | 15.1 ± 4.4       | 354 ± 220        | 0.540 ± 0.032 | 0.036 ± 0.007 | 0.245 ± 0.035 | 0.179 ± 0.074 |
| <b>Kcv<sub>S</sub> F78A</b>            | 42.1 ± 17.2     | 0.6 ± 0.1        | 7.9 ± 4.2        | -                | 0.971 ± 0.014 | 0.014 ± 0.005 | 0.015 ± 0.017 | 0             |
| <b>Kcv<sub>NTS</sub> G77S<br/>F78A</b> | 63.7 ± 60.1     | 1.3 ± 0.5        | 27.8 ± 16.5      | -                | 0.926 ± 0.026 | 0.026 ± 0.010 | 0.051 ± 0.018 | 0             |
| <b>Kcv<sub>S</sub> F78L</b>            | 21.8 ± 13.9     | 1.7 ± 0.6        | 13.5 ± 5.0       | 983 ± 419        | 0.348 ± 0.126 | 0.017 ± 0.011 | 0.199 ± 0.171 | 0.436 ± 0.305 |
| <b>Kcv<sub>S</sub> F78Y</b>            | 56.4 ± 6.0      | 1.9 ± 0.2        | 16.9 ± 2.1       | -                | 0.922 ± 0.012 | 0.025 ± 0.002 | 0.052 ± 0.013 | 0             |
| <b>Kcv<sub>NTS</sub> F78L</b>          | 108.8 ±<br>16.4 | 1.3 ± 0.2        | 27.3 ± 3.8       | -                | 0.916 ± 0.024 | 0.008 ± 0.001 | 0.077 ± 0.024 | 0             |

**Table S1: Mean lifetimes and probabilities of occupancy of Kcv<sub>NTS</sub>, Kcv<sub>S</sub> and some selected mutants.** The probabilities of occupancy P (±sd) and mean lifetimes  $\tau$  (±sd) of the open state O and the three closed states C1, C2 and C3 were calculated from three independent 5 min recordings at +120 mV.
